# Supplementary material
Source: publisher figshare collection journal article supplement (https://sage.figshare.com/ndownloader/files/12467786)
Supplement: Supplementary file 1 [file 12467786]

**Supplement**

**Methods**

*Multimorbidity diagnosis*

A detailed list of chronic conditions that meet the definition of multimorbidity are outlined in Table S1 [1].

| Table S1. List of conditions for definition of multimorbidity | | | |
| --- | --- | --- | --- |
| **Condition** | **Diagnosis** | **Condition** | **Diagnosis** |
| Hypertension | Ever recorded | Alcohol problems | Ever recorded |
| Depression | Recorded in past 12 months OR ≥ 4 anti-depressant prescriptions (excluding low-dose tricyclics) in last 12 months | Other psychoactive substance misuse | Ever recorded |
| Painful condition | ≥ 4 prescription only medicine analgesic prescriptions in last 12 months OR ≥ 4 specified anti-epileptics in the absence of epilepsy | Treated constipation | ≥ 4 laxative prescriptions in last year |
| Asthma | Ever recorded and any prescription in the past 12 months | Stroke and transient ischemic attack | Ever recorded |
| Coronary heart disease | Ever recorded | Chronic kidney disease | Ever recorded |
| Treated dyspepsia | ≥ 4 prescriptions in the last 12 months BNF 0103% excluding antacids AND NOT ≥ 4 NSAIDS or ≥ 4 aspirin/clopidogrel | Diverticular disease of intestine | Ever recorded |
| Diabetes | Ever recorded | Atrial fibrillation | Ever recorded |
| Thyroid disorders | Ever recorded | Peripheral vascular disease | Ever recorded |
| Rheumatoid arthritis, other inflammatory polyarthropathies and systematic connective tissue disorders | Ever recorded | Heart failure | Ever recorded |
| Hearing loss | Ever recorded | Prostate disorders | Ever recorded |
| Chronic obstructive pulmonary disease | Ever recorded | Glaucoma | Ever recorded |
| Anxiety, neurotic, stress related and somatoform disorders | Recorded in past 12 months OR ≥ 4 anxiolytic/hypnotic prescriptions in last 12 months OR ≥ 4 10/25mg amitriptyline in last 12 months and don’t meet Pain criteria | Epilepsy (currently treated) | Ever recorded AND antiepileptic prescription in last 12 months |
| Irritable bowel syndrome | Ever recorded OR ≥ 4 prescription only antispasmodic prescription in past 12 months | Dementia | Ever recorded |
| New diagnosis of cancer in past 5 years | Recorded in past 5 years | Schizophrenia (and related psychosis) or bipolar disorder | Ever recorded/in last 12 months OR lithium prescribed in last 168 days |
| Psoriasis or eczema | Ever recorded AND ≥ 4 prescriptions in last 12 months | Migraine | ≥ 4 prescription only medicine anti-migraine prescriptions in last year |
| Inflammatory bowel disease | Ever recorded | Blindness/low vision | Ever recorded |
| Chronic sinusitis | Ever recorded | Anorexia or bulimia | Ever recorded |
| Learning disability | Ever recorded | Bronchiectasis | Ever recorded |
| Parkinson’s disease | Ever recorded | Viral hepatitis | Ever recorded |
| Multiple sclerosis | Ever recorded | Chronic liver disease | Ever recorded |

*Full exclusion criteria*

Full exclusion criteria were:

- an inability to walk greater than fifty meters;
- severe cognitive impairment;
- psychiatric or intellectual disability which would limit the ability to participate in a class with distant supervision or the ability to complete outcome measures (defined as mini-mental state exam (MMSE) <= 18 points) [2];
- pulmonary hypertension with recent history of dizziness or syncope on exertion (must have medical clearance if mean pulmonary artery pressure > 50 mm Hg);
- acute pulmonary embolus;
- interstitial lung disease;
- unstable cardiovascular disease (e.g. unstable angina, uncontrolled arrhythmia, New York Heart (NYH) Class 4 chronic heart failure (CHF), uncontrolled hypertension, diastolic pressure > 95 mm Hg);
- absolute contraindications to exercise (e.g. severe orthopaedic/neurological deficit; severe uncontrolled pain: surgical or medical (including active transmissible infectious disease) restrictions to mobilization/rehabilitation (e.g. diabetic foot);
- severe ischemic vascular disease;
- advanced neuropathy/retinopathy which would compromise the ability to safely exercise);
- people already participating in a structured exercise rehabilitation program from a community or external provider;
- uncontrolled diabetes;
- uncontrolled epilepsy or seizures;
- extensive brain, skeletal or visceral metastases, life expectancy considered to be less than 12 months;
- known thrombocytopenia (<50×109/l) or severe neutropenia (neutropenia defined as absolute neutrophil count < 500/µL; profound neutropenia defined as ANL < 100 neutrophils/mm3 [2];
- room air desaturation at rest < 85%;
- abnormal and untreated moderate anaemia (80-109 g/L);
- pregnant women.

Usual cessation/withdrawal criteria for multimorbidity rehabilitation applied to all participants as follows:

- a change in a participant’s medical condition that made them unsuitable for exercise;
- non-attendance (if patient fails to attend six consecutive sessions);
- a participant withdrawal from the program.

For the safety criteria, exercise was ceased, during the corresponding exercise session, if a participant displayed the following observations during group exercise:

- heart rate (HR) > 160bpm;
- blood pressure (BP) > 180 mmHg or <90 mmHg (systolic) and > 110 mmHg or < 60 mmHg (diastolic);
- SpO2 < 88% (exercise temporarily ceased and resumed when SpO2 reached 88% or supplemental oxygen supplied);
- diaphoretic, pale or dizzy;
- room air desaturation at rest < 85%;
- syncope, dizziness, onset of angina or chest pain;

Exercise was not commenced if the participants displayed the following observations:

- fever > 38.0,
- new known thrombocytopenia (<50×109/l) or severe neutropenia (neutropenia defined as absolute neutrophil count < 500/µL; profound neutropenia defined as ANL < 100 neutrophils/mm3 [3].

*Outcome measures*

Measures of multimorbidity included:

The Cumulative Illness Rating Scale for Geriatrics (CIRS(G)) [4] is composed of 14 body system categories, with a severity scale for each domain [5]. It has been used to successfully classify medically impaired elderly subjects with good interrater reliability and face validity [4]. The Functional Comorbidity Index (FCI) [6] is an 18-item index based on diagnosis of comorbid diseases. One point per disease is scored with the scores summed to provide a single total score; the higher the score, the greater number of an individual’s co-morbidities. The Duke Severity of Illness Checklist (DUSOI) [7] assesses the severity of a person’s illness based on four parameters for each diagnosis, including symptoms, complications, prognosis without treatment and treatment potential.

Measures of illness perception included:

The Multimorbidity Illness Perception Scale (MULTIPleS) [8] explores five domains of emotional representations, treatment burden, prioritizing conditions, causal links and activity limitations. This assesses the impact of multimorbidity on illness perceptions, adjustments, clinical outcomes, quality of life and costs in this population, and is valid and reliable.

**Results**

Table S2. Main Diagnoses*

| **Main Diagnosis, n (%)** | **Rehabilitation Program**  **(n = 8)** | **Usual Care**  **(n = 8)** |
| --- | --- | --- |
| Acute Polyarthritis | 0 (0%) | 1 (13%) |
| Atrial Fibrillation | 0 (0%) | 1 (13%) |
| Benign Prostatic Hyperplasia | 0 (0%) | 1 (13%) |
| Bleeding Stoma | 0 (0%) | 1 (13%) |
| Cancer | 2 (25%) | 0 (0%) |
| Diabetes | 1 (13%) | 0 (0%) |
| Diarrhoea & Lethargy | 1 (13%) | 0 (0%) |
| Fractured Ribs | 1 (13%) | 0 (0%) |
| Laminectomy | 1 (13%) | 0 (0%) |
| Pneumonia | 0 (0%) | 1 (13%) |
| Rheumatoid Arthritis | 1 (13%) | 0 (0%) |
| Stroke | 0 (0%) | 1 (13%) |
| Transverse Myelitis | 1 (13%) | 0 (0%) |
| Tumour | 0 (0%) | 2 (25%) |

*main diagnoses as determined by the treating clinician at referral or hospital admission

*Overall prevalence of co-existing conditions by group*

Table S3. Prevalence of co-existing conditions

| **Other Co-existing Condition** (n, %) | **Rehabilitation Program**  **(n = 8)** | **Usual Care**  **(n = 8)** |
| --- | --- | --- |
| Alcohol Problems | 0 (0%) | 1 (13%) |
| Anxiety | 1 (13%) | 1 (13%) |
| Asthma | 1 (13%) | 2 (25%) |
| Atrial Fibrillation | 0 (0%) | 1 (13%) |
| Cancer (newly diagnosed) | 3 (38%) | 4 (50%) |
| Chronic Kidney Disease | 1 (13%) | 0 (0%) |
| Chronic Obstructive Pulmonary Disease | 2 (25%) | 3 (38%) |
| Chronic Sinusitis | 0 (0%) | 1 (13%) |
| Coronary Heart Disease | 2 (25%) | 4 (50%) |
| Depression | 2 (25%) | 2 (25%) |
| Diabetes | 5 (63%) | 4 (50%) |
| Diverticular Disease of Intestines | 1 (13%) | 0 (0%) |
| Hearing Loss | 1 (13%) | 0 (0%) |
| Heart Failure | 1 (13%) | 0 (0%) |
| Hypertension | 7 (88%) | 3 (38%) |
| Peripheral Vascular Disease | 1 (13%) | 0 (0%) |
| Prostate Disorders | 0 (0%) | 1 (13%) |
| Rheumatoid Arthritis | 1 (13%) | 0 (0%) |
| Stroke/Transient Ischaemic Attack | 1 (13%) | 2 (25%) |
| Thyroid Disorders | 0 (0%) | 1 (13%) |
| Treated Constipation | 1 (13%) | 0 (0%) |
| Treated Dyspepsia | 2 (25%) | 2 (25%) |

**Supplement References**

1. Barnett, K., et al., *Epidemiology of multimorbidity and implications for health care, research, and medical education: a cross-sectional study.* Lancet, 2012. **380**(9836): p. 37-43.

2. Tombaugh, T.N. and N.J. McIntyre, *The Mini‐Mental State Examination: A Comprehensive Review.* Journal of the American Geriatrics Society, 1992. **40**(9): p. 922-935.

3. Freifeld, A.G., et al., *Clinical Practice Guideline for the Use of Antimicrobial Agents in Neutropenic Patients with Cancer: 2010 Update by the Infectious Disease Society of America.* Clinical Infectious Diseases, 2011. **52**(4): p. 56-93.

4. Miller, M.D., et al., *Rating chronic medical illness burden in geropsychiatric practice and research: Application of the Cumulative Illness Rating Scale.* Psychiatry Research, 1992. **41**(3): p. 237-248.

5. Hudon, C., M. Fortin, and A. Vanasse, *Cumulative Illness Rating Scale was a reliable and valid index in a family practice context.* Journal of Clinical Epidemiology, 2005. **58**(6): p. 603-608.

6. Groll, D.L., et al., *The development of a comorbidity index with physical function as the outcome.* Journal of Clinical Epidemiology, 2005. **58**(6): p. 595-602.

7. Parkerson, G.R., et al., *The Duke severity of illness checklist (DUSOI) for measurement of severity and comorbidity.* Journal of Clinical Epidemiology, 1993. **46**(4): p. 379-393.

8. Gibbons, C.J., et al., *Development of a Multimorbidity Illness Perceptions Scale (MULTIPleS).* PLoS ONE, 2013. **8**(12): p. e81852.
